# Supplementary material
Source: HighWire-hosted journal article supplement (https://jnis.bmj.com/highwire/filestream/168926/field_highwire_adjunct_files/0/neurintsurg-2021-017963supp001_data_supplement.pdf)
Supplement: neurintsurg-2021-017963supp001_data_supplement.pdf [file neurintsurg-2021-017963supp001_data_supplement.pdf]

1

**Supplemental Material**

2

3

**Predictors of futile recanalization after endovascular treatment in acute ischemic**

4

**stroke: A meta-analysis**

5

1

**Supplemental table 1. Pooled analysis of the risk factors for futile recanalization after endovascular treatment.**

| Risk factors              | No. of involved studies | Estimates (95% CI)      | P value for overall effect | I <sup>2</sup> , % | P value for Begg's Test | P value for Egger's test |
|---------------------------|-------------------------|-------------------------|----------------------------|--------------------|-------------------------|--------------------------|
| Demographic               |                         |                         |                            |                    |                         |                          |
| Age                       | 12                      | MD 5.81 (4.16, 7.46)    | < 0.00001                  | 54                 | 0.640                   | 0.481                    |
| Female                    | 11                      | OR 1.40 (1.16, 1.68)    | 0.0004                     | 0                  | 0.533                   | 0.309                    |
| Past medical history      |                         |                         |                            |                    |                         |                          |
| Hypertension              | 11                      | OR 1.73 (1.43, 2.09)    | < 0.00001                  | 35                 | 0.482                   | 0.990                    |
| Diabetes                  | 11                      | OR 1.78 (1.41, 2.24)    | < 0.00001                  | 0                  | 0.592                   | 0.658                    |
| Atrial fibrillation       | 10                      | OR 1.24 (1.01, 1.51)    | 0.04                       | 0                  | 0.858                   | 0.816                    |
| Dyslipidemia              | 9                       | OR 1.01 (0.80, 1.28)    | 0.92                       | 0                  |                         |                          |
| Baseline test             |                         |                         |                            |                    |                         |                          |
| NIHSS                     | 11                      | MD 4.22 (3.38, 5.07)    | < 0.00001                  | 69                 | 0.640                   | 0.084                    |
| ASPECTS                   | 9                       | MD -0.71 (-1.23, -0.19) | 0.007                      | 91                 |                         |                          |
| SBP                       | 5                       | MD 4.98 (1.87, 8.09)    | 0.002                      | 0                  |                         |                          |
| DBP                       | 4                       | MD -0.36 (-3.14, 2.42)  | 0.80                       | 0                  |                         |                          |
| GLU                       | 5                       | MD 0.59 (0.37, 0.81)    | < 0.00001                  | 0                  |                         |                          |
| TOAST                     |                         |                         |                            |                    |                         |                          |
| LAA                       | 4                       | OR 0.92 (0.70, 1.21)    | 0.54                       | 0                  |                         |                          |
| Cardiogenic embolism      | 5                       | OR 1.06 (0.85, 1.33)    | 0.60                       | 0                  |                         |                          |
| Occlusion site            |                         |                         |                            |                    |                         |                          |
| ICA                       | 9                       | OR 1.85 (1.17, 2.95)    | 0.009                      | 53                 |                         |                          |
| MCA-M1                    | 7                       | OR 0.81 (0.51, 1.28)    | 0.37                       | 49                 |                         |                          |
| MCA-M2                    | 6                       | OR 0.70 (0.42, 1.18)    | 0.19                       | 9                  |                         |                          |
| Tandem occlusion          | 5                       | OR 1.30 (0.72, 2.33)    | 0.38                       | 53                 |                         |                          |
| Poor collateral           | 4                       | OR 2.58 (0.73, 9.18)    | 0.14                       | 85                 |                         |                          |
| procedure-related factors |                         |                         |                            |                    |                         |                          |
| IVT                       | 8                       | OR 0.67 (0.55, 0.83)    | 0.0001                     | 26                 |                         |                          |
| OTP                       | 7                       | MD 16.92 (6.52, 27.31)  | 0.001                      | 24                 |                         |                          |
| OTR                       | 8                       | MD 13.97 (-7.85, 35.80) | 0.21                       | 52                 |                         |                          |
| PTR                       | 7                       | MD 12.37 (7.96, 16.79)  | < 0.00001                  | 21                 |                         |                          |
| sICH                      | 5                       | OR 6.09 (3.18, 11.68)   | < 0.00001                  | 16                 |                         |                          |

EVT, endovascular treatment; CI, confidence interval; MD, mean difference; OR, odds ratio; NIHSS, NIH Stroke Scale; ASPECTS, Alberta Stroke Program Early Computed Tomography score; SBP, systolic blood pressure; DBP, diastolic blood pressure; GLU, glucose; TOAST, Trial of Org 10172 in Acute Stroke Treatment; LAA, large artery atherosclerosis; ICA, internal carotid artery; MCA, middle cerebral artery; IVT, intravenous thrombolysis; OTP, onset-to-puncture time; OTR, onset-to-recanalization time; PTR, puncture-to-recanalization time; sICH, symptomatic intracerebral hemorrhage.

2

3

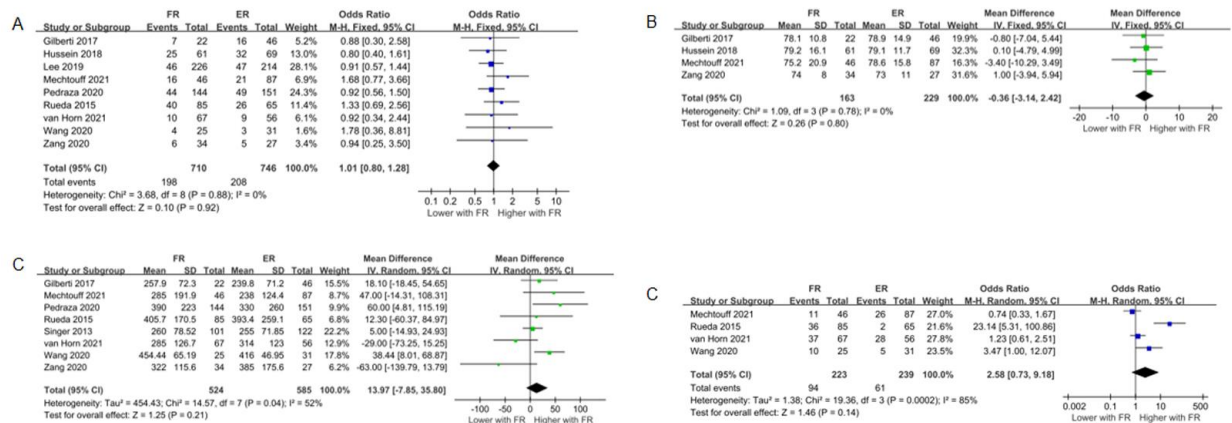

1

2 **Online supplemental figure 1.** Forest plots illustrating association of dyslipidemia (A),  
3 diastolic blood pressure (B), poor collaterals (C), and onset-to-recanalization time (D) with  
4 futile recanalization after endovascular therapy for acute ischemic stroke. FR, futile  
5 recanalization; ER, effective recanalization.

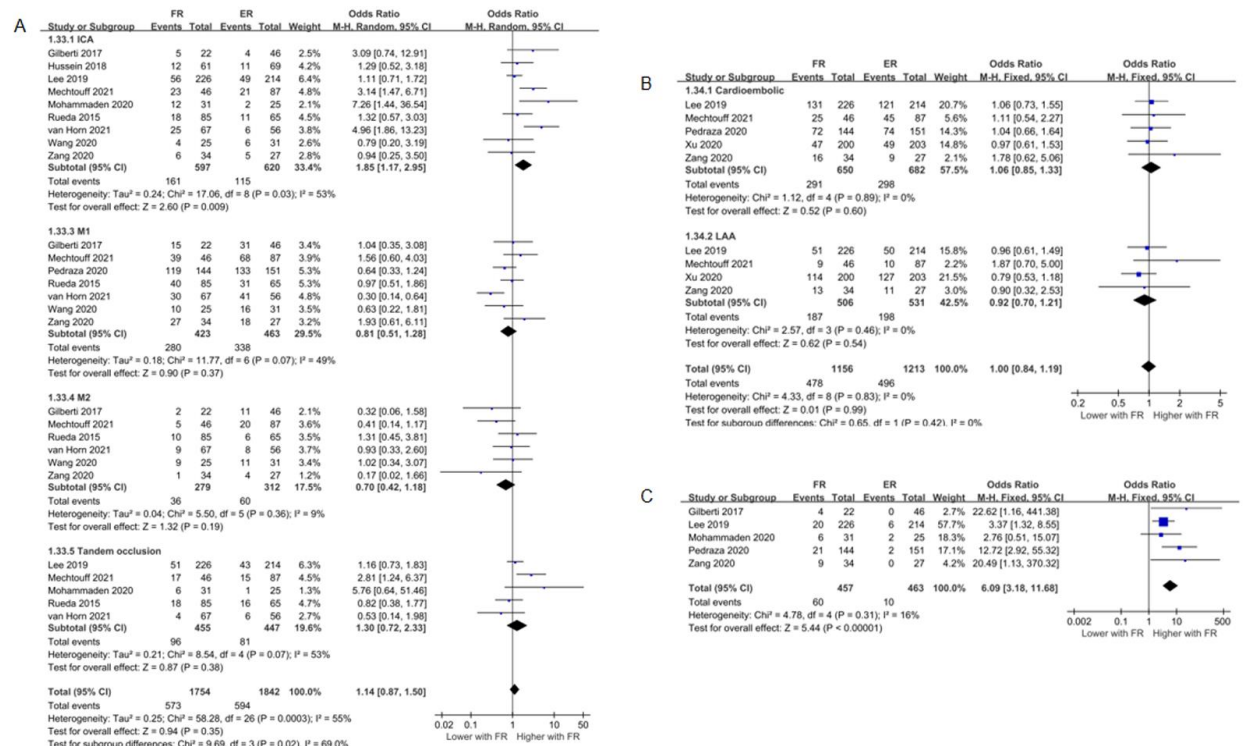

1  
2

3 **Online supplemental figure 2.** Forest plots illustrating association of occlusion sties (A),  
4 etiology classification according to TOAST (B), and symptomatic intracerebral hemorrhage (C)  
5 with futile recanalization after endovascular therapy for acute ischemic stroke. FR, futile  
6 recanalization; ER, effective recanalization.

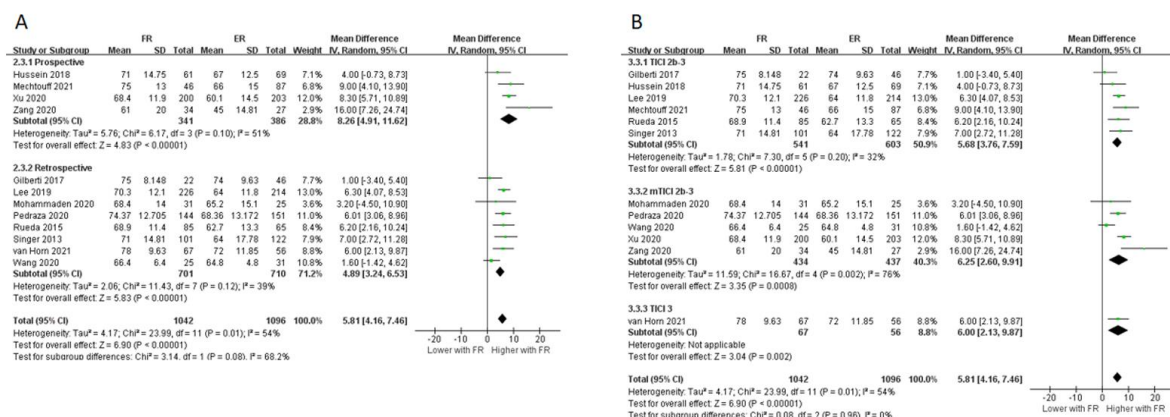

**Online supplemental figure 3.** Subgroup analysis of meta-analysis assessing age correlation with futile recanalization according to study design (A) and recanalization scale (B). FR – futile recanalization; ER – effective recanalization.

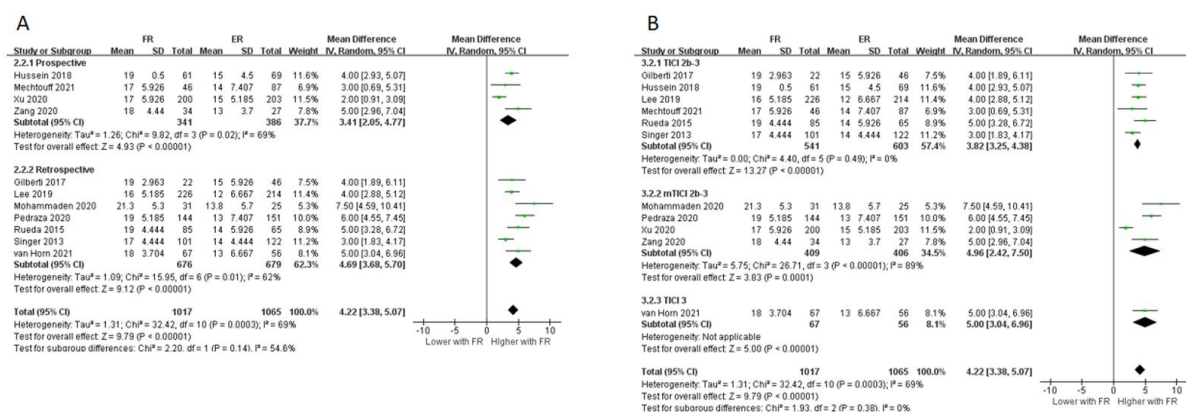

**Online supplemental figure 4.** Subgroup analysis of meta-analysis assessing NIHSS correlation with futile recanalization according to study design (A) and recanalization scale (B). FR – futile recanalization; ER – effective recanalization.

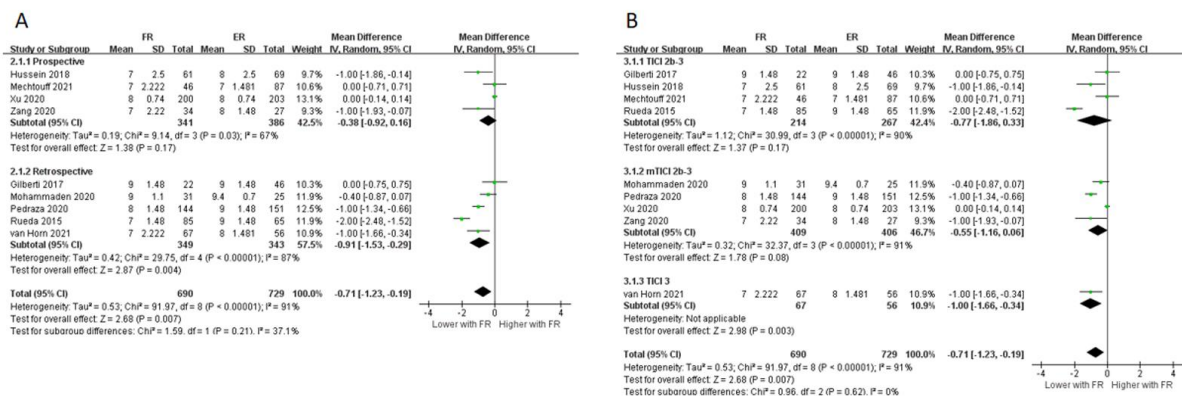

**Online supplemental figure 5.** Subgroup analysis of meta-analysis assessing ASPECTS correlation with futile recanalization according to study design (A) and recanalization scale (B). FR – futile recanalization; ER – effective recanalization.

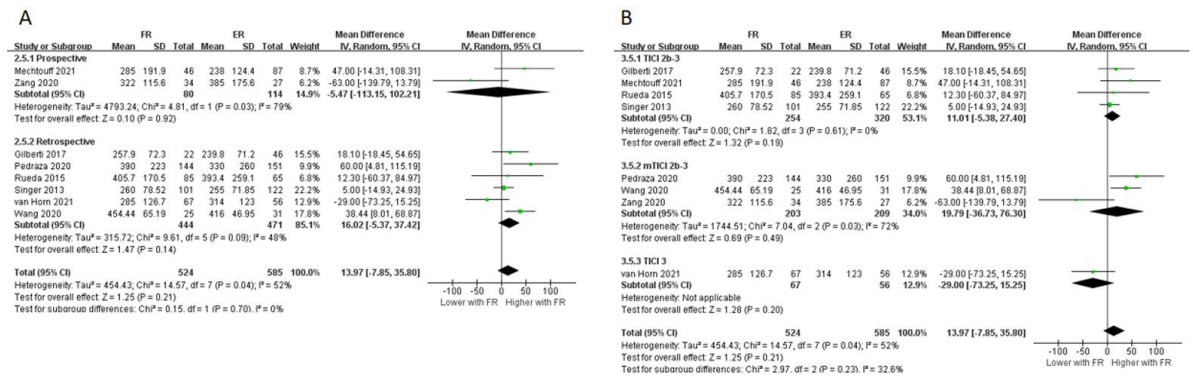

**Online supplemental figure 6.** Subgroup analysis of meta-analysis assessing onset-to-recanalization time correlation with futile recanalization according to study design (A) and recanalization scale (B). FR – futile recanalization; ER – effective recanalization.



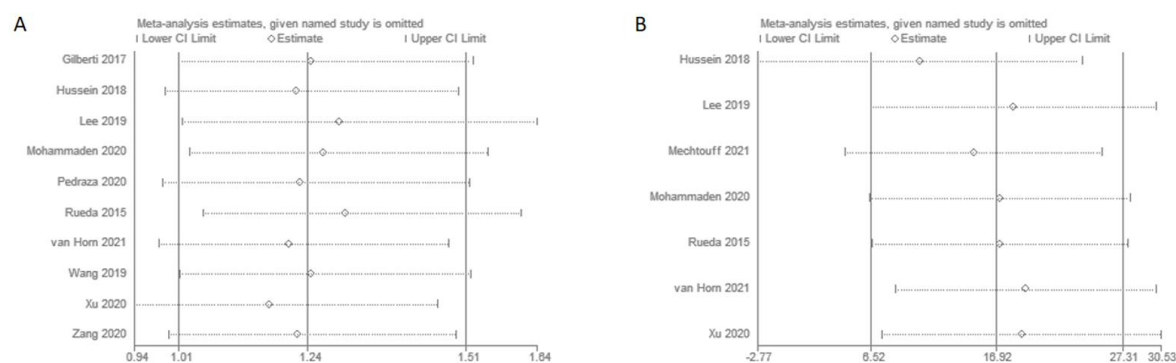

**Online supplemental figure 7.** Sensitivity analysis of studies pooled for atrial fibrillation (A) and onset-to-puncture time (B) correlation with futile recanalization. CI, confidence intervals.

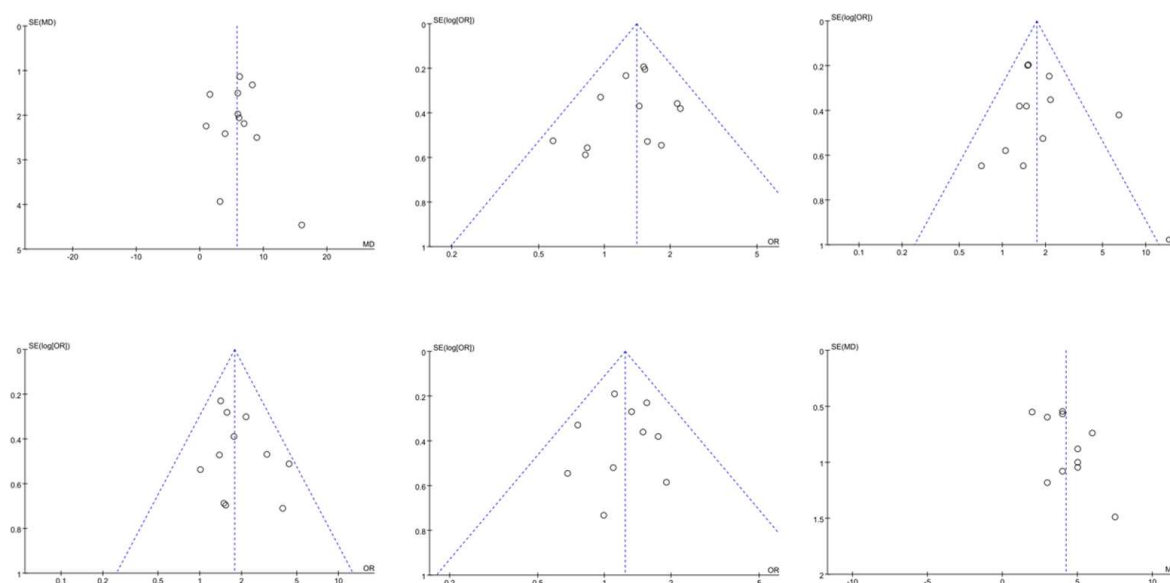

**Online supplemental figure 8.** Funnel plots for assessing publication bias of studies. (A) Age, (B) Female, (C) National Institute of Health Stroke Scale (NIHSS) score, (D) Hypertension, (E) Diabetes mellitus, (F) Atrial fibrillation.
